# Supplementary material for: Stabilization of VOPO4·2H2O voltage and capacity retention in aqueous zinc batteries with a hydrogen bond regulator
Source: Royal Society of Chemistry journal article supplement (doi:10.1039/d2cc00946c), 2022-01-01
Supplement: d2cc00946c1.pdf [file d2cc00946c1.pdf]

## Supporting Information

### **Stabilization of VOPO<sub>4</sub>·2H<sub>2</sub>O voltage and capacity retention in aqueous zinc batteries with a hydrogen bond regulator**

Zhongqiu Jia<sup>a</sup>, Xianpeng Yang<sup>a</sup>, Hua-Yu Shi<sup>a</sup>, Shouyan Hu<sup>a</sup>, and Xiaoqi Sun<sup>\*a</sup>

<sup>a</sup> Department of Chemistry, Northeastern University, 3-11 Wenhua Road, Shenyang, 110819, China

\* E-mail: sunxiaoqi@mail.neu.edu.cn

## Experimental Procedures

VOPO<sub>4</sub>·2H<sub>2</sub>O was synthesized by a reflux process. Typically, 0.8 g of V<sub>2</sub>O<sub>5</sub>, 4.4 mL of H<sub>3</sub>PO<sub>4</sub> (85%) and 30 mL of H<sub>2</sub>O were refluxed for 8 h. The precipitation was filtered, washed with ethanol and deionized water for several times and dried at 60 °C in a vacuum oven.

## Characterizations

X-ray diffraction (XRD) data was collected on a PANalytical Empyrean diffractometer with Cu-K $\alpha$  radiation. Morphologies were characterized by a scanning electron microscope equipped with an energy dispersive X-ray spectroscopy (EDS) detector (SU8010, HITACHI, Japan). X-ray photoelectron spectroscopy (XPS) measurements were carried out on an XPS spectrometer with Al-K $\alpha$  radiation (8.34 Å) as the excitation source (ESCALAB 250Xi, Thermo Scientific Escalab, USA). The Fourier transform infrared (FT-IR) spectra were collected on Lambda 650S (UK PerkinElmer). Raman spectra were obtained on a LabRAM HR Evolution series high-resolution Raman spectrometer (Nano Wizard Ultra Speed & inVia Raman, Germany) with a laser wavelength of 633 nm.

## Electrochemical Measurements

VOPO<sub>4</sub>·2H<sub>2</sub>O and Ketjen Black were mixed with a weight ratio of 2:1 in water and drop casted on carbon paper substrates. Galvanostatic charge-discharge was carried out in coin cells with VOPO<sub>4</sub>·2H<sub>2</sub>O and Zn foil as the cathode and anode, respectively. Electrochemical impedance spectroscopy (EIS) was recorded in three-electrode cells with Zn as the counter and reference electrodes. Electrochemical studies were performed on the Bio-logic VMP3 or Land CT-2001A battery cyclers.

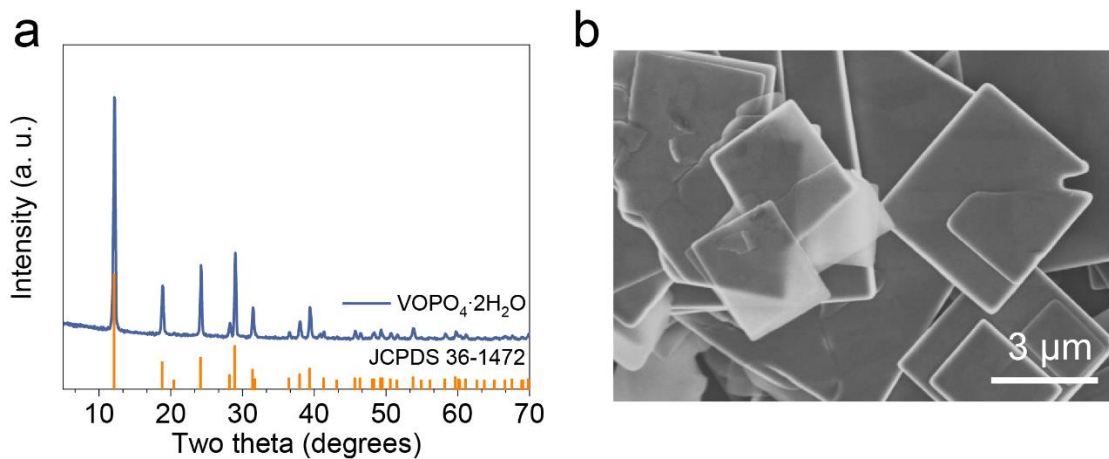

Figure S1. a) XRD pattern and b) SEM image of  $\text{VOPO}_4 \cdot 2\text{H}_2\text{O}$ .

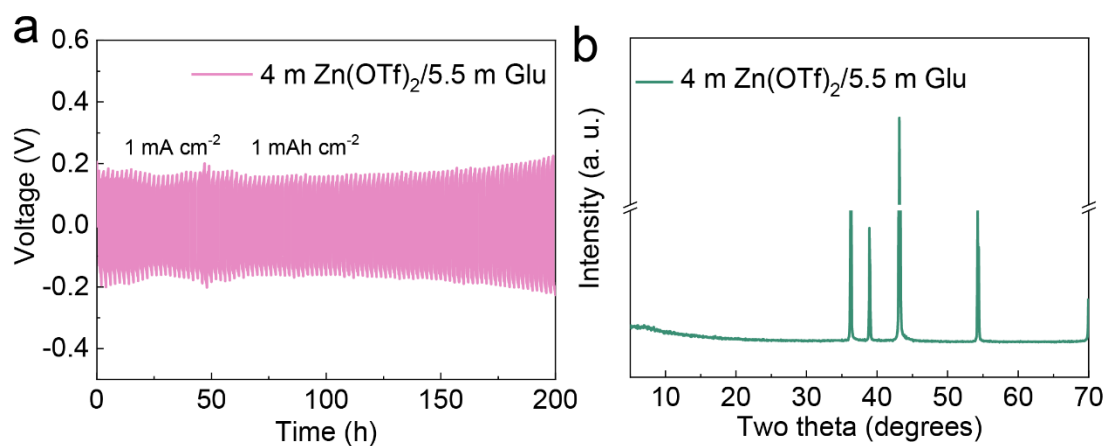

Figure S2. a) Zn plating/stripping behavior in the symmetric cell at current density of  $1 \text{ mA cm}^{-2}$  and capacity of  $1 \text{ mA h cm}^{-2}$ . b) XRD of Zn electrode after 20 cycles.

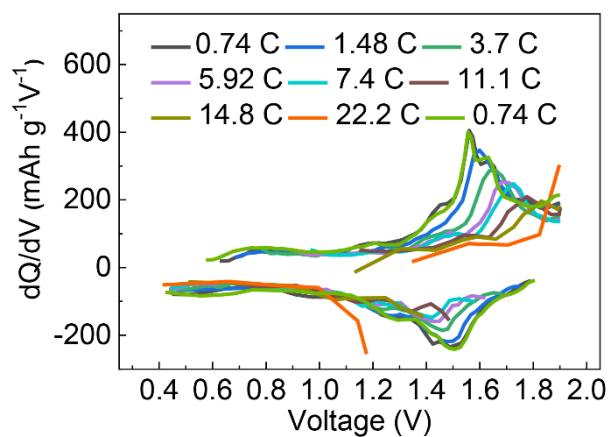

Figure S3. Differential capacity curves of  $\text{VOPO}_4 \cdot 2\text{H}_2\text{O}$  in  $4 \text{ m Zn(OTf)}_2/5.5 \text{ m Glu}$  electrolyte at various current densities.

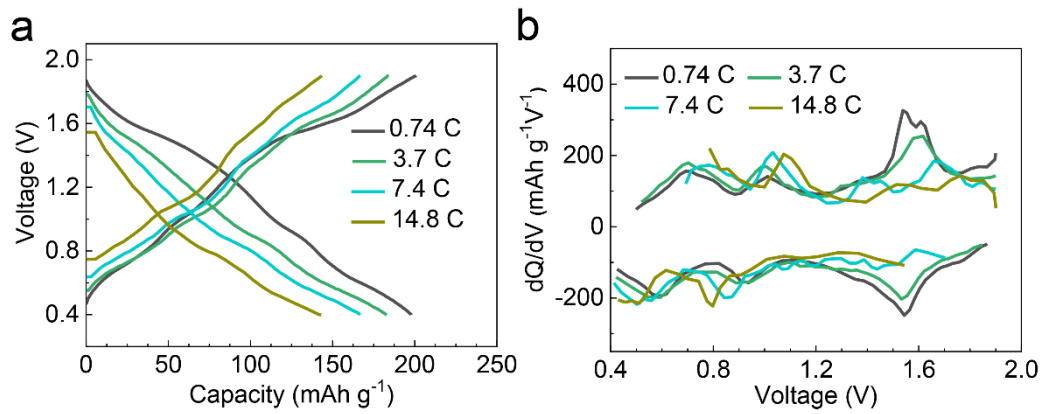

Figure S4. a) Charge-discharge and b) differential capacity curves of VOPO<sub>4</sub>·2H<sub>2</sub>O in 4 m Zn(OTf)<sub>2</sub> electrolyte at various current densities.

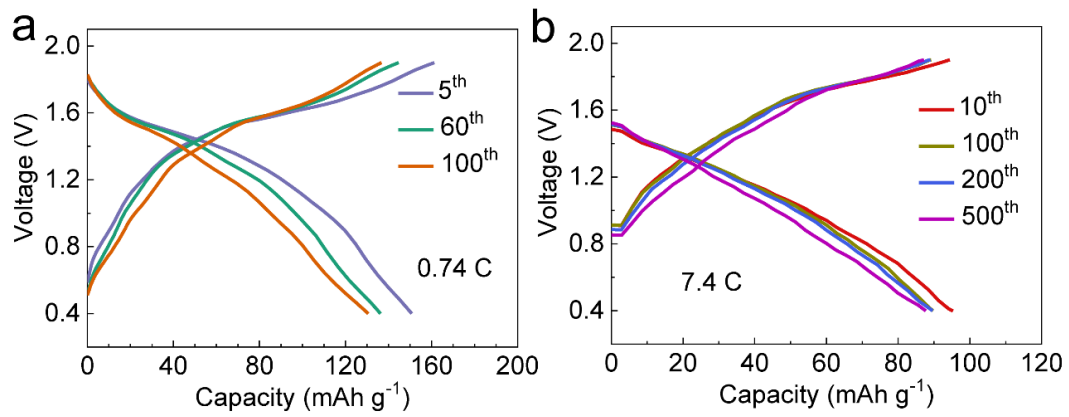

Figure S5. Charge-discharge curves of VOPO<sub>4</sub>·2H<sub>2</sub>O at different cycles in 4 m Zn(OTf)<sub>2</sub>/5.5 m Glu at a) 0.74 C and b) 7.4 C.

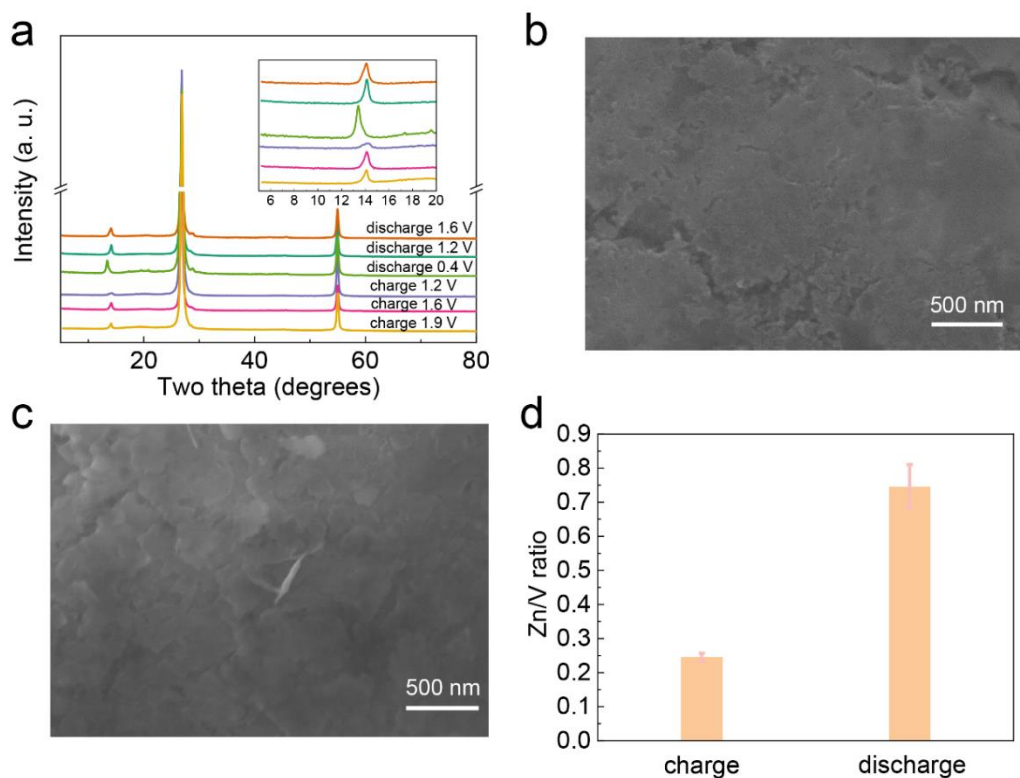

Figure S6. Characterizations of the VOPO<sub>4</sub>·2H<sub>2</sub>O cathode at different states of the 30th cycle in the 4 m Zn(OTf)<sub>2</sub>/5.5 m Glu electrolyte: a) XRD, SEM images of the b) charged and c) discharged electrodes, d) EDS Zn/V ratios.

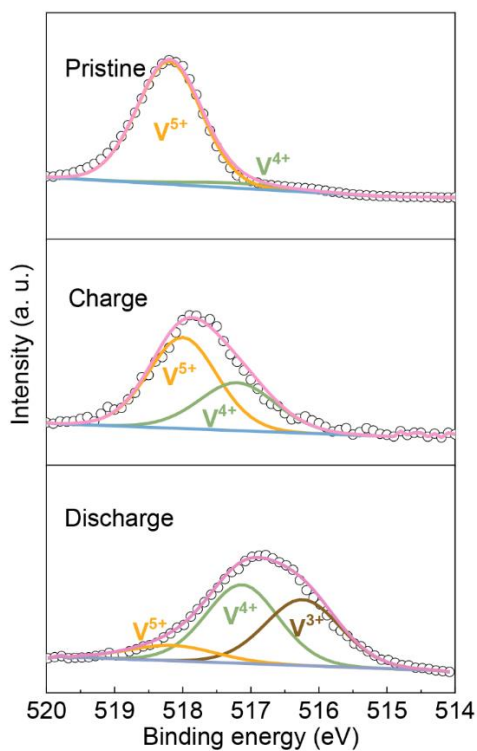

Figure S7. V 2p<sub>3/2</sub> XPS of VOPO<sub>4</sub>·2H<sub>2</sub>O cathode at different states of the 30th cycle in the 4 m Zn(OTf)<sub>2</sub>/5.5 m Glu electrolyte.

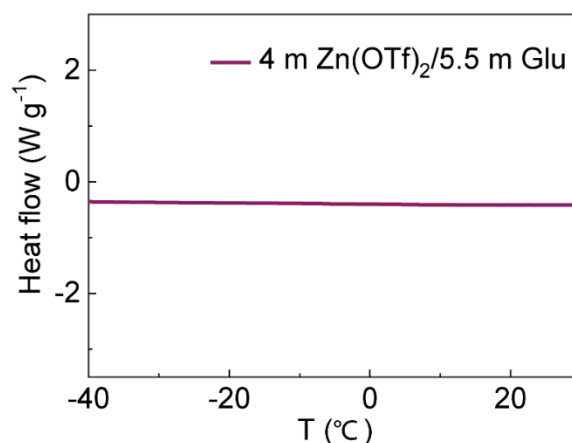

Figure S8. Differential scanning calorimetry (DSC) curve of the 4 m Zn(OTf)<sub>2</sub>/5.5 m Glu solution.

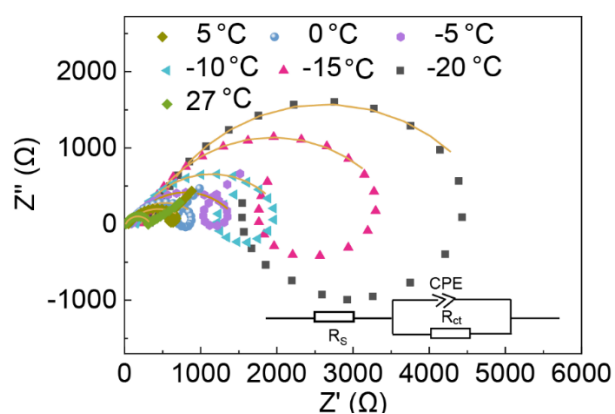

Figure S9. Nyquist plots and the fitted curves of the VOPO<sub>4</sub>·2H<sub>2</sub>O electrode in the 4 m Zn(OTf)<sub>2</sub>/5.5 m Glu electrolyte at different temperatures.

Table S1. The  $R_{ct}$  values from the fittings of Nyquist plots.

| Temperature (°C) | -20  | -15  | -10  | 5    | 0   | 5   | 27  |
|------------------|------|------|------|------|-----|-----|-----|
| $R_{ct}$ (Ω)     | 4620 | 3477 | 2012 | 1427 | 945 | 786 | 321 |

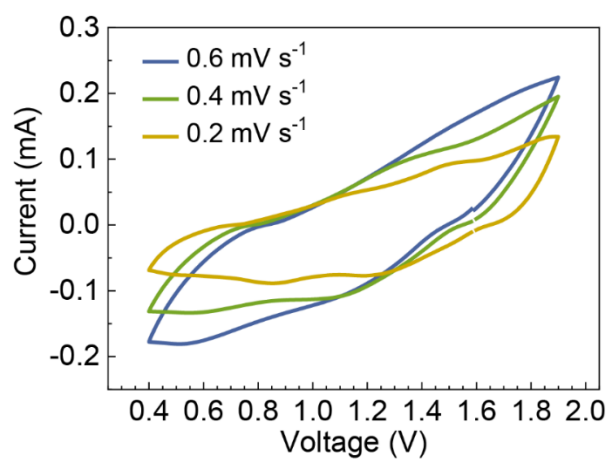

Figure S10. CV curves of VOPO<sub>4</sub>·2H<sub>2</sub>O in the 4 m Zn(OTf)<sub>2</sub>/5.5 m Glu electrolyte at different scan rates under -20 °C.
